# Supplementary material for: Estimating Wolf Population Size and Dynamics by Field Monitoring and Demographic Models: Implications for Management and Conservation
Source: MDPI journal article supplement (doi:10.3390/ani13111735), 2023-05-24
Supplement: s1 [file s1]

SUPPLEMENTARY MATERIAL

Table S5

Frequency of yearly success of packs detection methods (NIG = Non invasive genetics; CT = Camera trapping; WH =Wolf howling, OBS = Direct observations and carcasses)

| PACK CODE | PACK NAME                     | NIG (n° of years) | CT (n° of years) | WH (n° of years) | OBS (n° of years)2 | Pack years |
|-----------|-------------------------------|-------------------|------------------|------------------|--------------------|------------|
| 1         | Falterona                     |                   | 1                | 2                |                    | 3          |
| 2         | Muschioso-Pietra              |                   |                  | 1                |                    | 1          |
| 3         | Camaldoli                     |                   | 1                | 2                | 1                  | 3          |
| 4         | Tramignone                    | 1                 | 1                | 2                |                    | 3          |
| 5         | Vallesanta 1                  |                   | 2                | 2                |                    | 3          |
| 6         | Alto Tevere                   |                   | 2                |                  |                    | 2          |
| 7         | Alpe di Catenaiia Nord        | 2                 | 3                | 1                |                    | 3          |
| 8         | Poti sud                      | 3                 | 3                |                  |                    | 3          |
| 9         | Monte Fungaia                 |                   | 3                |                  | 1                  | 3          |
| 10        | Scheggia                      | 2                 | 2                |                  |                    | 2          |
| 11        | Poti Nord                     | 3                 | 3                |                  |                    | 3          |
| 12        | Alpe della Luna Sud           |                   | 3                | 3                |                    | 3          |
| 13        | Alpe della Luna Nord          |                   | 2                | 3                |                    | 3          |
| 14        | Fresciano-Casteldelci         |                   | 1                | 1                | 1                  | 2          |
| 15        | Sasso Simone                  |                   | 1                | 3                |                    | 3          |
| 16        | Pratomagno centro             |                   | 2                | 1                | 1                  | 3          |
| 17        | Castel Focognano              |                   | 3                | 1                |                    | 3          |
| 18        | Pratomagno sud                |                   | 3                | 2                |                    | 3          |
| 19        | Monte Favalto                 |                   | 3                |                  |                    | 3          |
| 20        | Lignano-Badicroce             | 3                 | 3                |                  |                    | 3          |
| 21        | Val di Chio-S.Egidio          |                   | 3                |                  |                    | 3          |
| 22        | Indicatore                    |                   | 3                | 1                |                    | 3          |
| 23        | Anghiari                      |                   | 1                |                  | 1                  | 1          |
| 24        | Montozzi                      |                   | 1                |                  |                    | 1          |
| 25        | Belagaio-Roccastrada          |                   |                  |                  | 3                  | 3          |
| 26        | Civitella Paganoico-Cinigiano |                   | 1                |                  |                    | 1          |
| 27        | Monterotondo-Pomarance        |                   | 2                |                  | 1                  | 3          |
| 28        | Civitella Paganico            |                   | 2                |                  |                    | 2          |
| 29        | Castellaccia-Gavorrano        |                   |                  |                  | 3                  | 3          |
| 30        | Castiglione della Pescaia     |                   |                  |                  | 3                  | 3          |
| 31        | Montorsaio-Rosaio Leoni       | 1                 | 3                | 1                |                    | 3          |
| 32        | Arcidosso-Stribugliano        |                   | 2                |                  | 2                  | 3          |
| 33        | Parco della Maremma           |                   | 2                | 2                |                    | 2          |
| 34        | Magliano in Toscana           |                   |                  |                  | 3                  | 3          |
| 35        | Saturnia-Scansano 2           | 1                 | 1                |                  | 1                  | 2          |
| 36        | Castell'Azzara-Penna          |                   | 1                |                  | 1                  | 2          |
| 37        | Sorano 1                      |                   | 1                | 1                | 2                  | 3          |
| 38        | Sorano 2                      |                   |                  |                  | 3                  | 3          |
| 39        | Pitigliano                    |                   |                  |                  | 3                  | 3          |
| 40        | Marsiliana                    |                   |                  |                  | 3                  | 3          |
| 41        | Cavriglia                     |                   |                  | 3                | 3                  | 3          |

|    |                                       |   |   |   |   |   |
|----|---------------------------------------|---|---|---|---|---|
| 42 | Castelnuovo Berardenga-Gaiole 2       |   | 1 | 2 | 1 | 3 |
| 43 | Rapolano Terme-Calcione               |   |   | 2 | 3 | 3 |
| 44 | Fontaccia-San Gimignano               |   | 3 |   |   | 3 |
| 45 | Gambassi-Libbiano                     | 2 | 3 |   |   | 3 |
| 46 | Sovicille 1-Centrale Enel             |   |   | 3 |   | 3 |
| 47 | Monteriggioni                         |   | 1 | 1 | 1 | 2 |
| 48 | Castelnuovo VC-Radicondoli            |   |   |   | 3 | 3 |
| 49 | Chiusdino-Luriano                     |   | 3 | 3 |   | 3 |
| 50 | Murlo                                 |   | 2 |   | 1 | 3 |
| 51 | Diga di Chianciano                    |   | 2 |   |   | 2 |
| 52 | Sarteano                              |   | 2 |   | 1 | 3 |
| 53 | Cetona                                |   | 2 |   | 1 | 3 |
| 54 | Montalcino 1                          |   | 2 | 1 |   | 2 |
| 55 | Castellina in Chianti                 |   |   | 1 | 1 | 1 |
| 56 | Pienza                                |   | 1 |   |   | 1 |
| 57 | Monti Livornesi                       |   | 2 | 1 | 1 | 3 |
| 58 | Castagneto                            | 1 | 2 |   |   | 2 |
| 59 | Caselli-Magona                        | 2 | 2 | 1 |   | 3 |
| 60 | Berignone-Tatti                       |   | 2 | 2 |   | 3 |
| 61 | Miemo                                 |   | 2 | 2 | 1 | 3 |
| 62 | Chianni-Santa Luce-Casciana terme     | 1 | 1 | 1 | 1 | 3 |
| 63 | Monterufoli                           |   | 2 |   |   | 2 |
| 64 | Montelopio                            |   |   |   | 1 | 1 |
| 65 | Fiorenzuola 3-Bruscoli                |   |   |   | 3 | 3 |
| 66 | Fiorenzuola 1-Collinccia              |   | 1 | 3 |   | 3 |
| 67 | Borgo San Lorenzo-Scarperia-Mansalto  | 2 | 2 | 1 |   | 3 |
| 68 | Palazzolo sul Senio-Roncaccio         | 2 | 3 | 1 |   | 3 |
| 69 | Fiorenzuola 2-Piancaldoli             |   |   |   | 3 | 3 |
| 70 | Marradi-Gamogna                       |   | 1 |   | 2 | 3 |
| 71 | Vicchio-Peschiera                     | 1 | 1 | 1 | 1 | 3 |
| 72 | Carbonile                             |   |   |   | 1 | 1 |
| 73 | Monte Giovi-Pontassieve               |   | 2 |   | 1 | 3 |
| 74 | P.Pratone-Fiesole-Pontassieve         |   |   |   | 3 | 3 |
| 75 | Incisa-S.Polo                         |   |   | 3 |   | 3 |
| 76 | p.Conca-Vaglia-Borgo San Lorenzo      |   | 2 |   | 1 | 3 |
| 77 | Barberino Mugello-Firenzuola-Gazzarro |   | 1 |   | 2 | 3 |
| 78 | Ronta                                 |   |   |   | 1 | 1 |
| 79 | Gualdo-Pomino                         | 1 |   | 2 |   | 2 |
| 80 | Dudda                                 |   |   | 1 |   | 1 |
| 81 | Montaione-Pillo                       | 2 | 2 |   | 1 | 3 |
| 82 | Montanino-Reggello                    |   | 1 | 1 | 1 | 3 |
| 83 | Badia                                 |   |   |   | 2 | 1 |

|     |                                            |   |   |   |   |   |
|-----|--------------------------------------------|---|---|---|---|---|
| 84  | Barberino Val d'Elsa-Poggibonsi-Castellina |   |   |   | 2 | 2 |
| 85  | Calvana                                    |   |   |   | 1 | 1 |
| 86  | Luiciana-Cantagallo                        |   | 1 |   | 2 | 3 |
| 87  | Carigiola                                  |   |   | 1 |   | 1 |
| 88  | Lavello-Acquerino                          |   | 1 | 2 |   | 3 |
| 89  | Sambuca Pistoiese                          |   | 1 | 2 |   | 3 |
| 90  | Lizzo-Castel di casio                      |   |   | 2 | 1 | 3 |
| 91  | Torri-Cantagallo-Sambuca                   | 1 | 3 | 1 |   | 3 |
| 92  | Brana-Sambuca p.se                         |   |   | 2 | 1 | 3 |
| 93  | Croce Arcana-Volata                        |   |   |   | 3 | 3 |
| 94  | Dynamo-S.Marcello P.se                     |   | 1 | 2 | 1 | 3 |
| 95  | Calamecca-Pontito                          |   |   | 1 | 2 | 3 |
| 96  | Marliana-Nievole                           |   | 2 | 1 | 1 | 3 |
| 97  | Apuane Sud                                 |   |   |   | 3 | 3 |
| 98  | Apuane Nord                                | 1 | 2 |   | 1 | 3 |
| 99  | Orecchiella                                |   | 2 | 2 | 1 | 3 |
| 100 | Capraia-Fosciandora                        |   |   | 1 | 2 | 3 |
| 101 | Orrido di Botri                            |   |   |   | 2 | 2 |
| 102 | Renaio-Monte Giovo                         |   |   |   | 2 | 2 |
| 103 | Zeri 1                                     |   |   | 3 |   | 3 |
| 104 | Zeri 2                                     |   |   | 3 |   | 3 |
| 105 | Pontremoli                                 |   |   | 3 |   | 3 |
| 106 | Filattiera                                 |   |   | 3 |   | 3 |
| 107 | Bagnone-Licciana nardi                     |   |   | 3 |   | 3 |
| 108 | Fivizzano                                  |   | 1 | 3 |   | 3 |
| 109 | Casola-Giuncugnano                         |   |   | 3 |   | 3 |
| 110 | Villafranca                                |   | 2 |   |   | 2 |
| 111 | Abetone-Orrido di botri                    |   |   |   | 3 | 2 |
| 112 | Uccelliera                                 |   |   |   | 2 | 2 |
| 113 | San Marcello Pistoiese                     |   |   |   | 2 | 2 |
| 114 | Calenzano                                  |   | 2 |   |   | 2 |
| 115 | Sovicille 2                                |   | 1 | 1 | 1 | 2 |
| 116 | Montalcino 2                               |   |   |   | 1 | 1 |
| 117 | Abbadia                                    |   |   |   | 1 | 1 |
| 118 | Asciano                                    |   |   |   | 1 | 1 |
| 119 | Gaiole 1                                   |   | 1 | 1 |   | 2 |
| 120 | Cotorniano                                 |   | 1 | 1 |   | 1 |
| 121 | Siena                                      |   |   |   | 1 | 1 |
| 122 | Castelnuovo Berardenga                     |   | 1 | 2 |   | 2 |
| 123 | Montieri 1                                 |   |   |   | 1 | 1 |
| 124 | Montieri 2                                 |   |   |   | 1 | 1 |
| 125 | Manciano                                   |   | 1 |   |   | 1 |
| 126 | Scansano 1                                 |   | 1 |   | 1 | 2 |
| 127 | Semproniano-Rocconi                        |   |   |   | 2 | 2 |
| 128 | Amiata                                     |   |   |   | 1 | 1 |
| 129 | Cinigiano                                  |   |   |   | 1 | 1 |
| 130 | Alpe di Catenaia Nord-Dama                 |   | 1 |   | 1 | 1 |
| 131 | Vallesanta 2                               |   | 1 | 1 |   | 1 |
| 132 | Radicofani                                 |   |   | 2 |   | 2 |

|                                             |                             |           |            |            |            |            |
|---------------------------------------------|-----------------------------|-----------|------------|------------|------------|------------|
| 133                                         | San Quirico d'Orcia         |           |            |            | 1          | 1          |
| 134                                         | Follonica-Suvereto-Montioni |           | 3          |            |            | 3          |
| 135                                         | Radda                       |           |            | 2          |            | 2          |
| N° of pack-years monitored with each method |                             | <b>32</b> | <b>145</b> | <b>113</b> | <b>120</b> | <b>326</b> |
| % on the 326 pack-years                     |                             | 9.8       | 44.5       | 34.7       | 36.8       |            |
| N° of packs monitored with each method      |                             | 19        | 80         | 63         | 74         |            |
| N° of packs monitored with only one method  |                             | 0         | 21         | 14         | 29         |            |
