# Supplementary material for: Estimating Wolf Population Size and Dynamics by Field Monitoring and Demographic Models: Implications for Management and Conservation
Source: MDPI journal article supplement (doi:10.3390/ani13111735), 2023-05-24
Supplement: s1 [file s1]

SUPPLEMENTARY MATERIAL

Table S3

Vortex PVA State variables and model structure

| Population state variable ID | Initialization function        | Transition function            |  |
|------------------------------|--------------------------------|--------------------------------|--|
| PS1                          | $=(45.588+(18.429*NRAND))/100$ | $=(45.588+(18.429*NRAND))/100$ |  |
| PS2                          | $=ITOT3$                       | $=ITOT3$                       |  |
| PS3                          | $=ITOT4$                       | $=ITOT4$                       |  |
| PS4                          | $=ITOT6$                       | $=ITOT6$                       |  |
| PS5                          | $=(20.41+(5.01*NRAND))$        | $=(20.41+(5.01*NRAND))$        |  |

  

| Individual state variable ID – Label | Initialization function | Birth function | Transition function                                                                                                                                                                                                                                                                                                                                                                                      |
|--------------------------------------|-------------------------|----------------|----------------------------------------------------------------------------------------------------------------------------------------------------------------------------------------------------------------------------------------------------------------------------------------------------------------------------------------------------------------------------------------------------------|
| IS1 – MATE                           | $=-1$                   | $=-1$          | $=IS1$                                                                                                                                                                                                                                                                                                                                                                                                   |
| IS2 – PREVBRDR                       | $=IS3$                  | $=0$           | $=IS3$                                                                                                                                                                                                                                                                                                                                                                                                   |
| IS3 – BRDR                           | $=(IS1>0)$              | $=0$           | $=(NMATES>0)$                                                                                                                                                                                                                                                                                                                                                                                            |
| IS4 – FBRDR                          | $=(S='F')*IS3$          | $=0$           | $=(S='F')*IS3$                                                                                                                                                                                                                                                                                                                                                                                           |
| IS5 – MBRDR                          | $=(S='M')*IS3$          | $=0$           | $=(S='M')*IS3$                                                                                                                                                                                                                                                                                                                                                                                           |
| IS6 – ADULTF                         | $=(S='F')*(A>0)$        | $=0$           | $=(S='F')*(A>0)$                                                                                                                                                                                                                                                                                                                                                                                         |
| IS7 – FPOOL                          | $=(IS4=1)$              | $=0$           | $=(S='F')*(A>1)*(A<11)*[(ROUND(P51*P54)<P53)*((IS3=1)OR((IS3=0)AND(IS2=1)))*(((P51*P54)/P53)>=RAND)+(ROUND(P51*P54)=P53)*((IS3=1)OR((IS3=0)AND(IS2=1)))+(ROUND(P51*P54)>P53)*((IS3=1)+(IS3=0)*(IS2=1)+(IS3=0)*(IS2=0)*(((P51*P54)-P53)/(P54-P53))>RAND)]$                                                                                                                                                |
| IS8 – MPOOL                          | $=(IS5=1)$              | $=0$           | $=(S='M')*[(IS3=1)OR(A<7)*(IS3=0)*(IS2=1)OR(IS3=0)*(IS2=0)*(A>1)*(A<7)*(((ROUND(P51*P54)<(P52-P53))*{(((2*P55*P53)+(P51*P54)>P53)*2*((P51*P54)-P53))-((P52-P53)-(0.71*P53))})/((M+0.01)-(P52-P53))>=RAND)+((ROUND(P51*P54))=(P52-P53))*((1.2*P55*0.01*(P52-P53))/((M+0.01)-(P52-P53))>=RAND)+((ROUND(P51*P54))>(P52-P53))*(((2*((P51*P54)-(P52-P53)))+(1.2*P55*(P52-P53)))/((M+0.01)-(P52-P53))>=RAND)]$ |

IS7 and IS8 were built as done for IS22 and IS23 respectively, in Carrol et al. [52], describing “probability to breed” computation for adult females and males

## References

52. Carroll, C.; Fredrickson, R.J.; Lacy, R.C. Developing Metapopulation Connectivity Criteria from Genetic and Habitat Data to Recover the Endangered Mexican Wolf. *Conserv. Biol.* **2013**, *28*, 76–86. <https://doi.org/10.1111/cobi.12156>.
