# Supplementary material for: Estimating Wolf Population Size and Dynamics by Field Monitoring and Demographic Models: Implications for Management and Conservation
Source: MDPI journal article supplement (doi:10.3390/ani13111735), 2023-05-24
Supplement: s1 [file s1]

SUPPLEMENTARY MATERIAL

Table S4

Self-assessment of the PVA model quality by mean of the guiding questions of Chaudhary & Oli (2020) [48].

| ID                           | Questions                                                                                                                                                        | Scores   |
|------------------------------|------------------------------------------------------------------------------------------------------------------------------------------------------------------|----------|
| <b>A. Background quality</b> |                                                                                                                                                                  |          |
| 1                            | Were the objectives clearly specified?                                                                                                                           | 1        |
| 2                            | Was the species life history sufficiently described?                                                                                                             | 1        |
| 3                            | Were the data collection techniques clearly explained?                                                                                                           | 1        |
| 4                            | Was the period of data collection clearly explained?                                                                                                             | 1        |
|                              | <i>Background quality comprehensive score</i>                                                                                                                    | <b>1</b> |
| <b>B. Model quality*</b>     |                                                                                                                                                                  |          |
| 5                            | Were the input parameters used in the PVA estimated using robust statistical methods and were these methods described clearly?                                   |          |
| 6                            | Were the uncertainties of input parameters included in the model?                                                                                                |          |
| 7                            | Was the model structure clearly defined                                                                                                                          |          |
| 8                            | Was the choice of the model structure clearly explained and justified?                                                                                           |          |
| 9                            | Was the model complexity and structure appropriate for the quantity and quality of data?                                                                         |          |
| 10                           | Was the choice of the modelling platform (software package or programming language) clearly stated?                                                              |          |
| 11                           | Were the density-dependence effects (including Allee effect) included? If it was included, was it adequately described? If excluded was the exclusion justified? |          |
| 12                           | Was the environmental stochasticity included? If it was included, was it adequately described? If excluded was the exclusion justified?                          |          |

|                                          |                                                                                                                                                                                                                      |             |
|------------------------------------------|----------------------------------------------------------------------------------------------------------------------------------------------------------------------------------------------------------------------|-------------|
| 13                                       | Was the demographic stochasticity included? If it was included, was it adequately described? If excluded was the exclusion justified?                                                                                |             |
| 14                                       | Was the genetic stochasticity included? If it was included, was it adequately described? If excluded was the exclusion justified?                                                                                    |             |
| 15                                       | Was any external effect that may influence the population included, and if excluded, was the exclusion justified?                                                                                                    |             |
| 16                                       | Were the management scenarios (e.g. population supplementation, fire regiments, habitat restoration and predator control) included? If included were they adequately described? If excluded was exclusion justified? |             |
| <i>Model quality comprehensive score</i> |                                                                                                                                                                                                                      | <b>0.85</b> |
| <b>C. Analysis quality</b>               |                                                                                                                                                                                                                      |             |
| 17                                       | Were the time horizons for population projection suitable for species biology and study objectives?                                                                                                                  | 1           |
| 18                                       | Were the number of iterations used for simulations clearly stated?                                                                                                                                                   | 1           |
| 19                                       | Were the results of all scenarios including baseline scenario reported and discussed?                                                                                                                                | 1           |
| 20                                       | Was the study-specific definition of probability of extinction, mean time of extinction, quasi-extinction clearly stated?                                                                                            | NA          |
| 21                                       | Was the mean of the population growth rate reported as an output parameter for each scenario?                                                                                                                        | 1           |
| 22                                       | Was mean of any parameter of extinction reported as an output parameter for each scenario?                                                                                                                           | 0           |
| 23                                       | Was variance of parameter of extinction reported for each scenario                                                                                                                                                   | 1           |
| 24                                       | Was the variance of time to extinction reported as an output parameter for each scenario?                                                                                                                            | NA          |
| 25                                       | Was sensitivity analysis of parameter of extinction for                                                                                                                                                              | 1           |

changes in vital rates included?

|    |                                                                                      |    |
|----|--------------------------------------------------------------------------------------|----|
| 26 | Was sensitivity analysis involving the time to extinction included?                  | NA |
| 27 | Were the limitations of model clearly discussed while making management suggestions? | 1  |
| 28 | Were the predictions of the model tested using follow up field data or test data?    | 0  |

*Analysis quality comprehensive score* **0.78**

---

|                        |             |
|------------------------|-------------|
| <b>Overall quality</b> | <b>0.85</b> |
|------------------------|-------------|

---

\* = because model structure was substantially derived by that of Carroll, Fredrickson & Lacy (2013) [52] whose model was evaluated in the paper by Chaudary & Oli, we adopted their score for this group;

NA = not appropriate (unuseful for the present study, since probability of extinction was negligible, i.e. 0.1%)

## References

48. Chaudhary, V.; Oli, M.K. A critical appraisal of population viability analysis. *Conserv. Biol.* **2020**, *34*, 26–40. <https://doi.org/10.1111/cobi.13414>.

52. Carroll, C.; Fredrickson, R.J.; Lacy, R.C. Developing Metapopulation Connectivity Criteria from Genetic and Habitat Data to Recover the Endangered Mexican Wolf. *Conserv. Biol.* **2013**, *28*, 76–86. <https://doi.org/10.1111/cobi.12156>.
