# Supplementary material for: Estimating Wolf Population Size and Dynamics by Field Monitoring and Demographic Models: Implications for Management and Conservation
Source: MDPI journal article supplement (doi:10.3390/ani13111735), 2023-05-24
Supplement: s1 [file s1]

# SUPPLEMENTARY MATERIAL

Table S1

Detailed effort and results in regional integrated survey

Provinces' acronyms: AR=Arezzo (including intensive study area), FI=Firenze, GR=Grosseto, LI=Livorno, LU=Lucca, MS=Massa-Carrara, PI=Pisa, PO=Prato, PT=Pistoia, SI=Siena; Wolf-howling: sessions =number of nights spent to stimulate howls from multiple points in the same area, positive responses= nights recording wolves' howls; Camera trapping: Sessions = number of trapping days, Locations = clusters of camera traps (within 3 km radius), Positive responses = records of wolves (every ten minutes). Packs detected by each Monitoring Unit, in bracket n° of packs occupying a territory in two or more different provinces (detected packs sum doesn't return the minimum number of observed packs).

| Province                                                                         | Year | Wolf howling    |                    | Camera trapping     |                 |                    | Genetic monitoring |                    | Packs detected (shared) |
|----------------------------------------------------------------------------------|------|-----------------|--------------------|---------------------|-----------------|--------------------|--------------------|--------------------|-------------------------|
|                                                                                  |      | Sessions        | Positive responses | Sessions            | Locations (N)   | Positive responses | Samples collected  | Positive responses |                         |
| AR                                                                               | 2014 | 24              | 12                 | 3043                | 41              | 536                | 44                 | 30                 | 22 (4)                  |
| FI                                                                               | 2014 | 24              | 10                 | 1170                | 62              | 41                 | 1                  | 1                  | 19 (7)                  |
| GR                                                                               | 2014 | 27              | 4                  | 510                 | 34              | 26                 | 2                  | 2                  | 21 (1)                  |
| LI                                                                               | 2014 | 4               | 1                  | 600                 | 8               | 30                 | 0                  | 0                  | 2 (1)                   |
| LU                                                                               | 2014 | 12              | 3                  | 480                 | 8               | 6                  | 1                  | 1                  | 9 (5)                   |
| MS                                                                               | 2014 | 57              | 9                  | 240                 | 12              | 7                  | 1                  | 1                  | 8 (2)                   |
| PI                                                                               | 2014 | 18              | 3                  | 815                 | 12              | 20                 | 1                  | 1                  | 7 (5)                   |
| PO                                                                               | 2014 | 9               | 5                  | 600                 | 20              | 16                 | 0                  | 0                  | 4 (3)                   |
| PT                                                                               | 2014 | 17              | 3                  | 552                 | 24              | 16                 | 8                  | 8                  | 12 (5)                  |
| SI                                                                               | 2014 | 30              | 8                  | 600                 | 40              | 29                 | 17                 | 17                 | 22 (4)                  |
| 2014 minimum regional number of observed packs (N° of packs shared by provinces) |      |                 |                    |                     |                 |                    |                    |                    | <b>107 (18)</b>         |
| AR                                                                               | 2015 | 28              | 9                  | 5119                | 79              | 1125               | 94                 | 84                 | 25 (4)                  |
| FI                                                                               | 2015 | 26              | 11                 | 1220                | 68              | 46                 | 7                  | 4                  | 18 (6)                  |
| GR                                                                               | 2015 | 80              | 25                 | 1050                | 70              | 49                 | 42                 | 30                 | 16 (1)                  |
| LI                                                                               | 2015 | 19              | 1                  | 505                 | 7               | 37                 | 4                  | 3                  | 3 (1)                   |
| LU                                                                               | 2015 | 14              | 5                  | 600                 | 18              | 10                 | 3                  | 2                  | 9 (4)                   |
| MS                                                                               | 2015 | 64              | 11                 | 480                 | 24              | 14                 | 4                  | 4                  | 8 (1)                   |
| PI                                                                               | 2015 | 10              | 2                  | 920                 | 13              | 35                 | 14                 | 1                  | 8 (5)                   |
| PO                                                                               | 2015 | 12              | 4                  | 640                 | 24              | 18                 | 1                  | 0                  | 4 (3)                   |
| PT                                                                               | 2015 | 27              | 8                  | 441                 | 16              | 12                 | 23                 | 20                 | 12 (5)                  |
| SI                                                                               | 2015 | 21              | 7                  | 510                 | 34              | 27                 | 1                  | 1                  | 24 (5)                  |
| 2015 minimum regional number of observed packs (N° of packs shared by provinces) |      |                 |                    |                     |                 |                    |                    |                    | <b>109 (17)</b>         |
| AR                                                                               | 2016 | 10              | 5                  | 2144                | 36              | 611                | 66                 | 41                 | 25 (2)                  |
| FI                                                                               | 2016 | 35              | 12                 | 1200                | 58              | 32                 | 15                 | 9                  | 23 (4)                  |
| GR                                                                               | 2016 | 80              | 22                 | 900                 | 60              | 38                 | 23                 | 10                 | 16 (0)                  |
| LI                                                                               | 2016 | 20              | 2                  | 480                 | 9               | 66                 | 10                 | 2                  | 3 (1)                   |
| LU                                                                               | 2016 | 18              | 4                  | 720                 | 22              | 12                 | 8                  | 6                  | 8 (2)                   |
| MS                                                                               | 2016 | 62              | 8                  | 480                 | 24              | 11                 | 7                  | 2                  | 8 (1)                   |
| PI                                                                               | 2016 | 22              | 4                  | 1080                | 24              | 40                 | 19                 | 16                 | 5 (1)                   |
| PO                                                                               | 2016 | 15              | 4                  | 720                 | 26              | 20                 | 1                  | 1                  | 5 (3)                   |
| PT                                                                               | 2016 | 24              | 6                  | 305                 | 14              | 11                 | 11                 | 7                  | 9 (3)                   |
| SI                                                                               | 2016 | 20              | 5                  | 450                 | 30              | 26                 | 13                 | 6                  | 17 (1)                  |
| 2016 minimum regional number of observed packs (N° of packs shared by provinces) |      |                 |                    |                     |                 |                    |                    |                    | <b>110 (15)</b>         |
| Yearly regional mean (min-max)                                                   |      | 276.3 (222-306) | 71.0 (58-83)       | 9524.7 (8610-11485) | 305.7 (261-353) | 989.0 (727-1373)   | 147.0 (75-174)     | 105.3 (61-149)     | <b>108.7 (107-110)</b>  |
